# Supplementary material
Source: publisher site journal article supplement (https://www.dovepress.com/article/262949)
Supplement: Supplementary file 1 [file get_supplementary_file.php]

## **Supplementary Material**

**Dose regimen rationale for panitumumab in cancer patients: to be based on  
body weight or not**

Michael Z. Liao, Marloes Berkhout, Hans Prenen, Sandeep Dutta, Vijay V. Upreti

**Supplemental Table S1. Overview of study sites and institutional review boards granting study approval for the studies included in this analysis**

| <b>Clinical Trial Study Site Number</b> | <b>Study Site (Location)</b>                                                            | <b>Institutional Review Board (Location)</b>                                                     |
|-----------------------------------------|-----------------------------------------------------------------------------------------|--------------------------------------------------------------------------------------------------|
| <b>NCT00089635<sup>a</sup></b>          |                                                                                         |                                                                                                  |
| 0012                                    | 5841 S Maryland Ave Mc 2115 (Chicago, IL, US)                                           | University of Chicago, Institutional Review Board (Chicago, IL, US)                              |
| 0086                                    | 777 Preston Research Building (Nashville, TN, US)                                       | Vanderbilt University, Institutional Review Board (Nashville, TN, US)                            |
| 0120                                    | 4301 W Markham Mail Slot 508 (Little Rock, AR, US)                                      | University of Arkansas for Medical Sciences Institutional Review Board (Little Rock, AR, US)     |
| 0908                                    | 4101 22nd Place (Lubbock, TX, US)                                                       | Covenant Health System Institutional Review Board (Lubbock, TX, US)                              |
| 0909                                    | 1801 SE Hillmoor Drive, Suite B-101 (Port St. Lucie, FL, US)                            | Western Institutional Review Board (Olympia, WA, US)                                             |
| 0910                                    | 11185 Mountain View Avenue Suite 151 (Loma Linda, CA, US)                               | Loma Linda University (Loma Linda, CA, US)                                                       |
| 1009                                    | 200 Hawthorne Lane (Charlotte, NC, US)                                                  | Presbyterian Healthcare Institutional Review Board (Charlotte, NC, US)                           |
| 1010                                    | 745 West State Street Suite 550B (Columbus, OH, US)                                     | Mount Carmel Institutional Review Board (Columbus, OH, US)                                       |
| 1016                                    | 910 E. Houston Street, Suite 100 (Tyler, TX, US)                                        | US Oncology, Inc. Institutional Review Board (Dallas, TX, US)                                    |
| 1019                                    | 169 Riverside Drive (Binghamton, NY, US)                                                | Western Institutional Review Board (Olympia, WA, US)                                             |
| 1027                                    | 300 W Pueblo Street (Santa Barbara, CA, US)                                             | Western Institutional Review Board (Olympia, WA, US)                                             |
| 1040                                    | Thomas and Dorothy Leavey Cancer Center (Northridge, CA, US)                            | Western Institutional Review Board (Olympia, WA, US)                                             |
| 1063                                    | 920 Stanton L Young Blvd. WP 2080, Dept. of Hematology/Oncology (Oklahoma City, OK, US) | University of Oklahoma Health Science Center (Oklahoma City, OK, US)                             |
| 1068                                    | 8940 North Wood Sage Road (Peoria, IL, US)                                              | Western Institutional Review Board (Olympia, WA, US)                                             |
| 1078                                    | 4801 East Linwood Blvd (Kansas City, MO, US)                                            | KVAMC (Kansas City, MO, US)                                                                      |
| 1082                                    | 1800 Williams Street Suite 200 (Denver, CO, US)                                         | Western Institutional Review Board (Olympia, WA, US)                                             |
| 1086                                    | 16 Penn Tower 3400 Spruce Street (Philadelphia, PA, US)                                 | Committee on Studies Involving Human Beings, Office of Regulatory Affairs (Philadelphia, PA, US) |
| 1087                                    | 330 Washington Street, Suite 220 (Norwich, CT, US)                                      | The William W. Backus Hospital (Norwich, CT, US)                                                 |

|      |                                                            |                                                                               |
|------|------------------------------------------------------------|-------------------------------------------------------------------------------|
| 1090 | 1025 Walnut Street Suite 1014 (Philadelphia, PA, US)       | Thomas Jefferson University Institutional Review Board (Philadelphia, PA, US) |
| 1092 | 2825 8th Avenue North (Billings, MT, US)                   | Quorum Review, Inc. (Seattle, WA, US)                                         |
| 1096 | 9711 Skokie Boulevard (Skokie, IL, US)                     | Western Institutional Review Board (Olympia, WA, US)                          |
| 1100 | 1348 Walton Way, Suite 4300 (Augusta, GA, US)              | Western Institutional Review Board (Olympia, WA, US)                          |
| 1104 | 95 Collier Road NW, Suite 5015 (Atlanta, GA, US)           | Quorum Review, Inc. (Seattle, WA, US)                                         |
| 1113 | 302 Kensington Avenue (Flint, MI, US)                      | Quorum Review, Inc. (Seattle, WA, US)                                         |
| 1114 | 8111 South Emerson (Indianapolis, IN, US)                  | Western Institutional Review Board (Olympia, WA, US)                          |
| 1115 | 34 Shelburne Road (Stamford, CT, US)                       | Western Institutional Review Board (Olympia, WA, US)                          |
| 1119 | 9143 Phillips Highway, Suite 560 (Jacksonville, FL, US)    | Western Institutional Review Board (Olympia, WA, US)                          |
| 1122 | 3838 S. 700 East, #100 (Salt Lake City, UT, US)            | Western Institutional Review Board (Olympia, WA, US)                          |
| 1123 | 1700 South Potomac St (Aurora, CO, US)                     | Western Institutional Review Board (Olympia, WA, US)                          |
| 1124 | 3027 N Circle Drive (Colorado Springs, CO, US)             | Western Institutional Review Board (Olympia, WA, US)                          |
| 1125 | 22 W Dry Creek Circle (Littleton, CO, US)                  | Western Institutional Review Board (Olympia, WA, US)                          |
| 1132 | Joan Karnell Cancer Center (Philadelphia, PA, US)          | Pennsylvania Hospital Institutional Review Board (Philadelphia, PA, US)       |
| 1144 | 600 East 233rd Street (Bronx, NY, US)                      | Our Lady of Mercy Medical Center Institutional Review Board (Bronx, NY, US)   |
| 1150 | 399 Melrose Drive, Suite B (Richardson, TX, US)            | Quorum Review, Inc. (Seattle, WA, US)                                         |
| 1152 | 490-A West Zia Road (Sante Fe, NM, US)                     | Quorum Review, Inc. (Seattle, WA, US)                                         |
| 1156 | 100 North Humphreys Boulevard, Suite 100 (Memphis, TN, US) | Western Institutional Review Board (Olympia, WA, US)                          |
| 1157 | 1075 Chase Parkway Street Suite # B (Waterbury, CT, US)    | Quorum Review, Inc. (Seattle, WA, US)                                         |
| 1159 | 18051 River Road, Suite 201 (Noblesville, IN, US)          | Western Institutional Review Board (Olympia, WA, US)                          |
| 1160 | 4403 Harrison Boulevard, Suite 1685 (Ogden, UT, US)        | Western Institutional Review Board (Olympia, WA, US)                          |
| 1161 | 1001 12th Avenue (Fort Worth, TX, US)                      | US Oncology, Inc., Institutional Review Board (Dallas, TX, USA)               |
| 1162 | 520 Country Club Road (Eugene, OR, US)                     | US Oncology, Inc., Institutional Review Board (Dallas, TX, US)                |
| 1165 | 1346 E County Line Road (Indianapolis, IN, US)             | US Oncology, Inc., Institutional Review Board (Dallas, TX, US)                |
| 1166 | 433 SW 10th Street (Ocala, FL, US)                         | US Oncology, Inc., Institutional Review Board (Dallas, TX, US)                |
| 1167 | 3555 W Wheatland (Dallas, TX, US)                          | US Oncology, Inc., Institutional Review Board (Dallas, TX, US)                |
| 1174 | 69 Prospect Avenue (Hudson, NY, US)                        | US Oncology, Inc., Institutional Review Board (Dallas, TX, US)                |

|                                |                                                                                 |                                                                |
|--------------------------------|---------------------------------------------------------------------------------|----------------------------------------------------------------|
| 1192                           | 317 S Manning Boulevard Suite 310 (Albany, NY, US)                              | US Oncology, Inc., Institutional Review Board (Dallas, TX, US) |
| 1216                           | 4320 Wornall Road Suites 212 & 220 (Kansas City, MO, US)                        | US Oncology, Inc., Institutional Review Board (Dallas, TX, US) |
| 1217                           | 4881 NE Goodview Circle (Lee's Summit, MO, US)                                  | US Oncology, Inc., Institutional Review Board (Dallas, TX, US) |
| 1228                           | 8503 Arlington Blvd., Suite 400 (Fairfax, VA, US)                               | US Oncology, Inc., Institutional Review Board (Dallas, TX, US) |
| 1232                           | 6204 Balcones Drive (Austin, TX, US)                                            | US Oncology, Inc., Institutional Review Board (Dallas, TX, US) |
| 1242                           | 59-16 174th Street (Fresh Meadows, NY, US)                                      | Quorum Review, Inc.(Seattle, WA, US)                           |
| 1244                           | 44105 15th Street West, Suite 207 (Lancaster, CA, US)                           | Quorum Review, Inc.(Seattle, WA, US)                           |
| 1245                           | 25 Hospital Center Boulevard, Medical Pavillion Suite 301 (Hilton Head, SC, US) | Quorum Review, Inc.(Seattle, WA, US)                           |
| 1247                           | 9110 Philadelphia Road, #314 (Baltimore, MD, US)                                | Quorum Review, Inc.(Seattle, WA, US)                           |
| 1252                           | 3320 Old Jefferson Road Building 700 (Athens, GA, US)                           | Western Institutional Review Board (Olympia, WA, US)           |
| 1257                           | 225 18th Street Southeast (Hickory, NC, US)                                     | US Oncology, Inc., Institutional Review Board (Dallas, TX, US) |
| 1270                           | 100 East Idaho Street (Boise, ID, US)                                           | St. Luke's Institutional Review Board (Boise, ID, US)          |
| 1275                           | 1930 East Route 70, Suite V107 (Cherry Hill, NJ, US)                            | Quorum Review, Inc.(Seattle, WA, US)                           |
| 1288                           | 1313 Red River, Suite 217 (Austin, TX, US)                                      | Quorum Review, Inc.(Seattle, WA, US)                           |
| <b>NCT00083616<sup>a</sup></b> |                                                                                 |                                                                |
| 0012                           | University of Chicago (Chicago, IL, US)                                         | University of Chicago (Chicago, IL US)                         |
| 0086                           | Vanderbilt University (Nashville, TN, US)                                       | Vanderbilt University (Nashville, TN, US)                      |
| 0361                           | University of Texas – Southwestern (Dallas, TX, US)                             | UT Southwestern Medical Center at Dallas (Dallas, TX, US)      |
| 0908                           | Joe Arrington Cancer Research and Treatment Center (Lubbock, TX)                | Covenant Health System IRB (Lubbock, TX, US)                   |
| 0909                           | Hematology Oncology Associates of Treasure Coast (Port St. Lucie, FL, US)       | Western Institutional Review Board (Olympia, WA, US)           |
| 0910                           | Loma Linda University (Loma Linda, CA, US)                                      | Loma Linda University (Loma Linda, CA, US)                     |
| 1011                           | Comprehensive Blood and Cancer Center (Bakersfield, CA, US)                     | Western Institutional Review Board (Olympia, WA, US)           |

|      |                                                                                            |                                                                        |
|------|--------------------------------------------------------------------------------------------|------------------------------------------------------------------------|
| 1017 | Comprehensive Cancer Centers of Nevada (Las Vegas, NV, US)                                 | Western Institutional Review Board (Olympia, WA, US)                   |
| 1019 | Broome Oncology, LLC (Binghamton, NY, US)                                                  | Western Institutional Review Board (Olympia, WA, US)                   |
| 1023 | MD Anderson Cancer Center (Houston, TX, US)                                                | University of Texas MD Anderson Cancer Center (Houston, TX, US)        |
| 1027 | Santa Barbara Hematology Oncology Group, Inc. (Santa Barbara, CA, US)                      | Western Institutional Review Board (Olympia, WA, US)                   |
| 1035 | California Oncology of the Central Valley (Fresno, CA, US)                                 | Western Institutional Review Board (Olympia, WA, US)                   |
| 1042 | Comprehensive Cancer Centers of Nevada – Henderson (Henderson, NV, US)                     | Comprehensive Cancer Centers of Nevada – Henderson (Henderson, NV, US) |
| 1043 | Pacific Shores Medical Group – Long Beach (Long Beach, CA, US)                             | Western Institutional Review Board (Olympia, WA, US)                   |
| 1044 | Central Hematology Oncology Group (Monterey Park, CA, US)                                  | Western Institutional Review Board (Olympia, WA, US)                   |
| 1047 | Sansum Santa Barbara Medical Foundation Clinic (Santa Barbara, CA, US)                     | Western Institutional Review Board (Olympia, WA, US)                   |
| 1051 | Mid-Ohio Oncology Hematology Inc –West (Columbus, OH, US)                                  | Mount Carmel Institutional Review Board (Columbus, OH, US)             |
| 1063 | University of Oklahoma Health Sciences Center (Oklahoma City, OK, US)                      | University of Oklahoma Health Science Center (Oklahoma City, OK, US)   |
| 1082 | Rocky Mountain Cancer Centers (Denver, CO, US)                                             | Western Institutional Review Board (Olympia, WA, US)                   |
| 1083 | N/A                                                                                        | Dean Foundation for Health Research & Education (Middleton, WI, US)    |
| 1086 | University of Pennsylvania Cancer Center (Philadelphia, PA, US)                            | University of Pennsylvania (Philadelphia, PA, US)                      |
| 1088 | Nebraska Methodist Hospital (Omaha, NE, US)                                                | Nebraska Methodist Hospital (Omaha, NE, US)                            |
| 1090 | Thomas Jefferson University (Philadelphia, PA, US)                                         | Thomas Jefferson University (Philadelphia, PA, US)                     |
| 1092 | Deaconess Billings Clinic (Billings, MT, US)                                               | Quorum Review, Inc. (Seattle, WA, US)                                  |
| 1095 | University of Southern California/Norris Comprehensive Cancer Center (Los Angeles, CA, US) | Western Institutional Review Board (Olympia, WA, US)                   |
| 1100 | Augusta Oncology Associates, PC Walton (Augusta, GA, US)                                   | Western Institutional Review Board (Olympia, WA, US)                   |
| 1103 | The Family Practice Center (Collierville, TN, US)                                          | Western Institutional Review Board (Olympia, WA, US)                   |

|      |                                                                                            |                                                                   |
|------|--------------------------------------------------------------------------------------------|-------------------------------------------------------------------|
| 1108 | Midwest Cancer Research (Chicago, IL, US)                                                  | Western Institutional Review Board (Olympia, WA, US)              |
| 1113 | Genesys Hurley Cancer Institute, Cancer and Blood Disease Treatment Center (Flint, MI, US) | Quorum Review, Inc. (Seattle, WA, US)                             |
| 1115 | Hematology Oncology PC (Stamford, CT, US)                                                  | Western Institutional Review Board (Olympia, WA, US)              |
| 1122 | Utah Cancer Specialists (Salt Lake City, UT, US)                                           | Western Institutional Review Board (Olympia, WA, US)              |
| 1124 | Rocky Mountain Cancer Centers – Colorado Springs (Colorado Springs, CO, US)                | Western Institutional Review Board (Olympia, WA, US)              |
| 1126 | Rocky Mountain Cancer Centers – Boulder (Boulder, CO, US)                                  | Western Institutional Review Board (Olympia, WA, US)              |
| 1128 | Montgomery Cancer Center (Montgomery, AL, US)                                              | Quorum Review, Inc. (Seattle, WA, US)                             |
| 1132 | Pennsylvania Hematology Oncology Associates (Philadelphia, PA, US)                         | N/A                                                               |
| 1135 | University of North Carolina – Chapel Hill, Div Of Medical Oncology (Chapel Hill, NC, US)  | University of North Carolina at Chapel Hill (Chapel Hill, NC, US) |
| 1147 | Drs. Sandenbaum and Joseph Associates, Inc. (Cranston, RI, US)                             | Western Institutional Review Board (Olympia, WA, US)              |
| 1149 | NYU Medical School (New York, NY, US)                                                      | BRANY Institutional Review Board (Great Neck, NY, US)             |
| 1152 | New Mexico Cancer Associates (Sante Fe, NM, US)                                            | Quorum Review, Inc. (Seattle, WA, US)                             |
| 1155 | Gabrail Cancer Center (Canton, OH, US)                                                     | Western Institutional Review Board (Olympia, WA, US)              |
| 1162 | Willamette Valley Cancer Center – Eugene (Eugene, OR, US)                                  | US Oncology, Inc. Institutional Review Board (Dallas, TX, US)     |
| 1174 | Cavell Cancer Treatment Program (Hudson, NY, US)                                           | US Oncology, Inc. Institutional Review Board (Dallas, TX, US)     |
| 1179 | Texas Oncology PA – Sammons Cancer Center (Dallas, TX, US)                                 | US Oncology, Inc. Institutional Review Board (Dallas, TX, US)     |
| 1180 | Willamette Valley Cancer Center – Springfield (Springfield, OR, US)                        | US Oncology, Inc. Institutional Review Board (Dallas, TX, US)     |
| 1185 | Arch Medical Services, Inc. (Washington, MO, US)                                           | US Oncology, Inc. Institutional Review Board (Dallas, TX, US)     |
| 1188 | Minnesota Oncology Hematology –Maplewood (Maplewood, MN, US)                               | US Oncology, Inc. Institutional Review Board (Dallas, TX, US)     |
| 1212 | Hematology Oncology Physicians – SMO (Tucson, AZ, US)                                      | US Oncology, Inc. Institutional Review Board (Dallas, TX, US)     |

|                                |                                                                                                                |                                                                                             |
|--------------------------------|----------------------------------------------------------------------------------------------------------------|---------------------------------------------------------------------------------------------|
| 1214                           | Kansas City Cancer Centers – North (Kansas City, MO, US)                                                       | US Oncology, Inc. Institutional Review Board (Dallas, TX, US)                               |
| 1215                           | Kansas City Cancer Centers – South (Kansas City, MO, US)                                                       | US Oncology, Inc. Institutional Review Board (Dallas, TX, US)                               |
| 1218                           | The Don and Sybil Harrington Cancer Center (Amarillo, TX, US)                                                  | Western Institutional Review Board (Olympia, WA, US)                                        |
| 1219                           | Kansas City Cancer Centers, LLC (Overland Park, KS, US)                                                        | US Oncology, Inc. Institutional Review Board (Dallas, TX, US)                               |
| 1224                           | Oncology and Hematology Associates of Southwest Virginia (Salem, VA, US)                                       | US Oncology, Inc. Institutional Review Board (Dallas, TX, US)                               |
| 1226                           | N/A                                                                                                            | US Oncology, Inc. Institutional Review Board (Dallas, TX, US)                               |
| 1228                           | N/A                                                                                                            | US Oncology, Inc. Institutional Review Board (Dallas, TX, US)                               |
| 1232                           | Texas Oncology Cancer Center (Austin, TX, US)                                                                  | US Oncology, Inc. Institutional Review Board (Dallas, TX, US)                               |
| 1244                           | Antelope Valley Cancer Center (Lancaster, CA, US)                                                              | Quorum Review, Inc. (Seattle, WA, US)                                                       |
| 1280                           | Gainesville Hematology Oncology Associates (Gainesville, FL, US)                                               | Quorum Review, Inc. (Seattle, WA, US)                                                       |
| 1281                           | N/A                                                                                                            | Western Institutional Review Board (Olympia, WA, US)                                        |
| 1282                           | N/A                                                                                                            | Western Institutional Review Board (Olympia, WA, US)                                        |
| 1283                           | N/A                                                                                                            | Western Institutional Review Board (Olympia, WA, US)                                        |
| 1285                           | N/A                                                                                                            | Quorum Review, Inc. (Seattle, WA, US)                                                       |
| 1288                           | N/A                                                                                                            | Quorum Review, Inc. (Seattle, WA, US)                                                       |
| <b>NCT00113763<sup>a</sup></b> |                                                                                                                |                                                                                             |
| 1001                           | Universitätsklinik für Innere Medizin I, Abteilung für Onkologie I (Wien, Austria)                             | Ethikkommission des AKH und der Universitätskliniken Wien (Wien, Austria)                   |
| 1002                           | Aö KH Wels, 4. Interne Abteilung (Wels, Austria)                                                               | Ethikkommission des A.ö. KH der Barmherzigen Schwestern, vom Heiligen Kreuz (Wels, Austria) |
| 1003                           | Kaiser-Franz Josef-Spital, LBI für angewandte Krebsforschung an der 3. Medizinischen Abteilung (Wien, Austria) | Ethikkommission der Stadt Wien (Wien, Austria)                                              |
| 1004                           | Universitätsklinik für Innere Medizin (Innsbruck, Austria)                                                     | Ethikkommission der Medizinischen Fakultät der Universität Innsbruck (Innsbruck, Austria)   |
| 1101                           | UZ Gasthuisberg, Gastro-Enterology Department (Leuven, Belgium)                                                | Faculty of Medicine Medical Ethics Committee/Clinical Trials (Leuven, Belgium)              |

|      |                                                                                                                        |                                                                                                                                                              |
|------|------------------------------------------------------------------------------------------------------------------------|--------------------------------------------------------------------------------------------------------------------------------------------------------------|
| 1102 | Institut J. Bordet, Gastro-Entérology Department (Brussels, Belgium)                                                   | Comité d' Ethique, Institut J. Bordet (Brussels, Belgium)                                                                                                    |
| 1103 | UZ Gent, Gastro-Enterology Department (Gent, Belgium)                                                                  | Ethical Committee, UZ Gent (Gent, Belgium)                                                                                                                   |
| 1104 | UCL St. Luc - Centre des Tumeurs, Oncologie Clinique (Brussels, Belgium)                                               | Commission d'Ethique Biomédicale Hopitalo-Facultaire de l'UCL (Brussels, Belgium)                                                                            |
| 1105 | C.H. Notre Dame et Reine Fabiola, Onco-Hematology Department (Charleroi, Belgium)                                      | Ethical Committee, C.H. Notre Dame et Reine Fabiola (Charleroi, Belgium)                                                                                     |
| 1106 | AZ VUB, Oncologic Center (Brussels, Belgium)                                                                           | Ethical Committee, AZ VUB (Brussels, Belgium)                                                                                                                |
| 1107 | Hôpital Erasme, Gastro-Enterology Department (Brussels, Belgium)                                                       | Comité d'Ethique, Hôpital Erasme (Brussels, Belgium)                                                                                                         |
| 1201 | Hépatogastro-entérologie, Institut Arnault Tzanck (Saint Laurent du Var, France)                                       | C.C.P.R.B. de Champagne-Ardenne, Hôpital Maison Blanche (REIMS, France)                                                                                      |
| 1202 | Hôpital Tenon (Paris, France)                                                                                          | C.C.P.R.B. de Champagne-Ardenne, Hôpital Maison Blanche (Reims, France)                                                                                      |
| 1203 | Hôpital Saint-Joseph, Service d'Hépatogastro-entérologie (Marseille, France)                                           | C.C.P.R.B. de Champagne-Ardenne, Hôpital Maison Blanche (Reims, France)                                                                                      |
| 1205 | CHU de Reims – Hôpital Robert Debré, Département d'Hépatogastro-entérologie / oncologie digestive (Reims, France)      | Comité Consultatif de Protection des Personnes dans la Recherche Biomédicale de Champagne-Ardenne, Hôpital Maison Blanche (Reims, France)                    |
| 1208 | Hôpital Ambroise Paré (Boulogne, France)                                                                               | C.C.P.R.B. de Champagne-Ardenne, Hôpital Maison Blanche (Reims, France)                                                                                      |
| 1209 | Clinique Sainte Catherine (Avignon, France)                                                                            | C.C.P.R.B. de Champagne-Ardenne, Hôpital Maison Blanche (Reims, France)                                                                                      |
| 1211 | Hôpital Lévêque, Service d'Hépatogastro-entérologie (Pessac, France)                                                   | C.C.P.R.B. de Champagne-Ardenne, Hôpital Maison Blanche (Reims, France)                                                                                      |
| 1212 | Département de Médecine – Oncologie Médicale 1, Institut Paoli-Calmettes (Marseille, France)                           | C.C.P.R.B. de Champagne-Ardenne, Hôpital Maison Blanche (Reims, France)                                                                                      |
| 1303 | Westpfalz Klinikum GmbH, Medizinische Klinik I, Innere Medizin (Kaiserslautern, Germany)                               | Central: Ethik-Kommission der Bayerischen Landesärztekammer (München, Germany)<br>Local: Landesärztekammer Rheinland-Pfalz, Ethikkommission (Mainz, Germany) |
| 1304 | Krankenhaus der Barmherzigen Brüder Medizinische Klinik IV, Internistische Onkologie/Hämatologie (Regensburg, Germany) | Ethik-Kommission der Bayerischen Landesärztekammer (München, Germany)                                                                                        |
| 1306 | Klinik für Innere Medizin II, Klinikum der Stadt Villingen-Schwenningen (Villingen-Schwenningen, Germany)              | Central: Ethik-Kommission der Bayerischen Landesärztekammer (München, Germany)                                                                               |



|      |                                                                                                        |                                                                                                                                                                                               |
|------|--------------------------------------------------------------------------------------------------------|-----------------------------------------------------------------------------------------------------------------------------------------------------------------------------------------------|
|      |                                                                                                        | Local: Ethik-Kommission der Albert-Ludwigs-Universität Freiburg (Freiburg, Germany)                                                                                                           |
| 1309 | DIAKO, Ev. Diakonie-Krankenhaus GmbH, Abteilung Hämatologie/Internistische Onkologie (Bremen, Germany) | Central: Ethik-Kommission der Bayerischen Landesärztekammer (München, Germany)<br>Local: Ethikkommission der Landesärztekammer Bremen, Institut für Klinische Pharmakologie (Bremen, Germany) |
| 1312 | Gemeinschaftspraxis, Hämatologen – Internistische Onkologen (Rehling, Germany)                         | Bayerische Landesärztekammer, Ethikkommission (München, Germany)                                                                                                                              |
| 1313 | Caritasklinik St. Theresia, Klinik für Hämatologie und Onkologie (Saarbrücken, Germany)                | Central: Ethik-Kommission der Bayerischen Landesärztekammer (München, Germany)<br>Local: Ärztekammer des Saarlandes, Ethikkommission (Saarbrücken, Germany)                                   |
| 1401 | Ospedale Niguarda Ca' Granda, P.zza Ospedale Maggiore 3 (Milano, Italy)                                | Comitato etico scientifico, Ospedale Niguarda Ca' Granda (Milano, Italy)                                                                                                                      |
| 1402 | A.O. San Camillo Forlanini (Roma Italy)                                                                | Secretaria Comitato Etico, Farmacia Ospedale S. Camillo (Roma, Italy)                                                                                                                         |
| 1403 | Azienda Ospedaliera Umberto I, Sede Torrette (Ancona, Italy)                                           | Comitato Etico, Azienda Ospedaliera Umberto I (Ancona, Italy)                                                                                                                                 |
| 1404 | Istituto Clinico Humanitas, Department of Medical Oncology and Hematology (Milan, Italy)               | Comitato Etico, Azienda Sanitaria Locale della Provincia di Milano 2 (Milan, Italy)                                                                                                           |
| 1405 | U.O. Oncologia Medica – Centro Oncologico, Modenese COM, Policlinico di Modena (Modena, Italy)         | Comitato Etico Provinciale di Modena, Policlinico di Modena (Modena, Italy)                                                                                                                   |
| 1406 | Dipartimento di Oncologia Medica, Azienda Ospedaliera San Martino (Genova, Italy)                      | Comitato Etico, Azienda Ospedaliera San Martino e Cliniche Universitarie Convenzionate (Genova, Italy)                                                                                        |
| 1408 | Istituto per lo Studio e la Cura dei Tumori (Milano, Italy)                                            | Comitato Etico, Istituto per lo Studio e la Cura dei Tumori (Milano, Italy)                                                                                                                   |
| 1409 | Policlinico Umberto I, Università La Sapienza (Roma, Italy)                                            | Comitato Etico, Azienda Policlinico Umberto I di Roma (Roma, Italy)                                                                                                                           |
| 1410 | I.R.C.C.S. Ospedale Oncologico – di Bari (Bari, Italy)                                                 | Comitato Etico, I.R.C.C.S. Ospedale Oncologico – di Bari (Bari, Italy)                                                                                                                        |
| 1411 | Istituti Fisioterapici Ospitalieri (IFO) - IRCCS Regina Elena (Roma, Italy)                            | Segreteria Comitato Etico, IRCCS Regina Elena – IRCCS San Gallicano (Roma, Italy)                                                                                                             |
| 1412 | Department Medical Oncology, Catholic University (Roma, Italy)                                         | Comitato Etico, Catholic University – Policlinico Gemelli (Roma, Italy)                                                                                                                       |
| 1502 | Universitair Medisch Centrum Utrecht, (Utrecht, The Netherlands)                                       | Ethics Committee of the Universitair Medisch Centrum Utrecht (Utrecht, The Netherlands)                                                                                                       |

|      |                                                                                                                                         |                                                                                                                                                                           |
|------|-----------------------------------------------------------------------------------------------------------------------------------------|---------------------------------------------------------------------------------------------------------------------------------------------------------------------------|
|      |                                                                                                                                         | Stichting Therapeutische Evaluatie Geneesmiddelen (Duivendrecht, The Netherlands)                                                                                         |
| 1504 | Albert-Schweitzer Ziekenhuis, (Dordrecht, The Netherlands)                                                                              | Ethics Committee of the Albert Schweitzer Ziekenhuis (Dordrecht, The Netherlands)<br>Stichting Therapeutische Evaluatie Geneesmiddelen (Duivendrecht, The Netherlands)    |
| 1505 | St. Ziekenhuis Lievensberg (Bergen op Zoom, The Netherlands)                                                                            | Ethics Committee of the St. Ziekenhuis Lievensberg (Bergen op Zoom, The Netherlands)<br>Stichting Therapeutische Evaluatie Geneesmiddelen (Duivendrecht, The Netherlands) |
| 1601 | Instituto Português de Oncologia Francisco Gentil, Centro Regional de Oncologia de Lisboa, SA (Lisboa, Portugal)                        | Comissão de Ético do Instituto Português de Oncologia Francisco Gentil, Centro Regional de Oncologia de Lisboa, SA (Lisboa, Portugal)                                     |
| 1602 | Instituto Português de Oncologia Francisco Gentil, Centro Regional de Oncologia do Porto, SA, Serviço de Oncologia II (Porto, Portugal) | Instituto Português de Oncologia Francisco Gentil, Centro Regional de Oncologia do Porto, SA, Serviço de Oncologia II (Porto, Portugal)                                   |
| 1603 | Hospital Santo António dos Capuchos – Medicina 1 (Lisboa, Portugal)                                                                     | Comissão de Ética do Hospital Santo António dos Capuchos, Alameda Sto. António dos Capuchos (Lisboa, Portugal)                                                            |
| 1604 | Hospital de Santa Maria (Lisboa, Portugal)                                                                                              | Comissão de Ética do Hospital de Santa Maria (Lisboa, Portugal)                                                                                                           |
| 1606 | Instituto Português de Oncologia Francisco Gentil, Centro Regional de Oncologia de Coimbra, S.A. (Coimbra, Portugal)                    | Comissão de Ética do Instituto Português de Oncologia Francisco Gentil, Centro Regional de Oncologia de Coimbra, S.A. (Coimbra, Portugal)                                 |
| 1701 | Hospital Clínico San Carlos, Servicio de Oncología Médica (Madrid, Spain)                                                               | Hospital Clínico San Carlos Comité Etico de Investigación Clínico (Madrid, Spain)<br>Agencia Española del Medicamento (Madrid, Spain)                                     |
| 1702 | Hospital Clínico Universitario de Valencia, Oncology-Hematology Department (Valencia, Spain)                                            | Clinical Research Ethics Committee, Hospital Clínico Universitario de Valencia (Valencia, Spain)<br>Agencia Española del Medicamento (Madrid, Spain)                      |
| 1703 | Hospital 12 de Octubre, Oncology Department (Madrid, Spain)                                                                             | Comité Ético de Investigación Clínica, Hospital 12 de Octubre (Madrid, Spain)<br>Agencia Española del Medicamento (Madrid, Spain)                                         |
| 1704 | Hospital General de Alicante, Oncology Department (Alicante, Spain)                                                                     | Comité ético de Investigación Clínica, Hospital General de Alicante (Alicante, Spain)<br>Agencia Española del Medicamento (Madrid, Spain)                                 |
| 1705 | Oncology Department, Hospital General de Elche (Elche, Spain)                                                                           | Comité Ético de Investigación Clínica<br>Hospital General de Elche (Elche, Spain)<br>Agencia Española del Medicamento (Madrid, Spain)                                     |

|      |                                                                                       |                                                                                                                                                                   |
|------|---------------------------------------------------------------------------------------|-------------------------------------------------------------------------------------------------------------------------------------------------------------------|
| 1707 | Hospital Carlos Haya, Servicio de Oncología Médica (Malaga, Spain)                    | Hospital Carlos Haya, Comité Etico de Investigación Clínica (Malaga, Spain)<br>Hospital Germans Trias I Pujol<br>Carretera del Canyet (Barcelona, Spain)          |
| 1708 | Hospital Clínic I Provincial de Barcelona, Oncology Department (Barcelona, Spain)     | Clinical Research Ethics Committee, Hospital Clínic I Provincial de Barcelona (Barcelona, Spain)<br>Agencia Española del Medicamento (Madrid, Spain)              |
| 1709 | Hospital Vall d'Hebrón, Oncology Department (Barcelona, Spain)                        | Clinical Research Ethics Committee, Hospital Vall d'Hebrón (Barcelona, Spain)<br>Agencia Española del Medicamento (Madrid, Spain)                                 |
| 1803 | Kantonspital St. Gallen, Haus 01, Fachbereich Onkologie (St Gallen, Switzerland)      | Ethikkommission des Kantons St. Gallen, Kantonsspital St. Gallen (St Gallen, Switzerland)                                                                         |
| 1804 | Institut für Medizinische Onkologie, Inselspital (Bern, Switzerland)                  | Kantonale Ethikkommission Bern (Bern, Switzerland)                                                                                                                |
| 3004 | Masarykuv onkologický ústav (Brno, Czech Republic)                                    | SUKL (Praha, Czech Republic)<br>Multicentrická etická komise FN Motol (Praha, Czech Republic)<br>Etická komise Masarykuv onkologický ústav (Brno, Czech Republic) |
| 3005 | Nemocnice Chomutov, Onkologické Centrum (Chomutov, Czech Republic)                    | Multicentrická etická komise FN Motol (Praha, Czech Republic)<br>Etická komise Nemocnice Chomutov (Chomutov, Czech Republic)                                      |
| 3101 | T.Y.P.E.T. Hygeias Melathron Clinic, Oncology Department (Athens, Greece)             | Administrative Board, T.Y.P.E.T. Hygeias Meathron Clinic (Athens, Greece)                                                                                         |
| 3104 | University Hospital of Patras, Internal Medicine Oncology Department (Patras, Greece) | Committee of Ethics & Deontology Scientific Board, University Hospital of Patras (Patras, Greece)                                                                 |
| 3201 | Vas County Markusovszky Hospital (Markusovszky, Hungary)                              | Vas County Markusovszky Hospital Regional Ethics Committee (Markusovszky, Hungary)                                                                                |
| 3202 | Petz Aladár County Hospital (Gyor Zrinyi, Hungary)                                    | Gyor-Moson-Sopron Esztergom-Komárom County Research Ethics Committee (Gyor, Hungary)                                                                              |
| 3206 | Szent László Hospital (Budapest, Hungary)                                             | Szent László Hospital Ethics Committee (Budapest, Hungary)                                                                                                        |
| 3208 | National Institute of Oncology (Budapest, Hungary)                                    | National Institute of Oncology Institutional Research Ethics Committee (Budapest, Hungary)                                                                        |
| 3402 | National Cancer Institute (Bratislava, Slovakia)                                      | Regulatory Authorities (Bratislava, Slovakia)<br>Ethics Committee of National Cancer Institute (Bratislava, Slovakia)                                             |
| 3403 | Oncology Institute of St. Alzbeta (Bratislava, Slovakia)                              | Regulatory Authorities (Bratislava, Slovakia)<br>Ethics Committee of Oncology Institute of St. Alzbeta (Bratislava, Slovakia)                                     |
| 4001 | Illawarra Area Health Service Wollongong Hospital (Wollongong, NSW, Australia)        | University of Wollongong Illawarra Area Health Service Office of Research (North Wollongong, NSW, Australia)                                                      |

|      |                                                                                                                            |                                                                                                         |
|------|----------------------------------------------------------------------------------------------------------------------------|---------------------------------------------------------------------------------------------------------|
| 4002 | Mater Misericordiae Adult Hospital (South Brisbane, QLD, Australia)                                                        | Mater Health Services Human Research Ethics Committee (South Brisbane, QLD, Australia)                  |
| 4003 | Border Medical Oncology (Wodonga, VIC, Australia)                                                                          | Joint Hospital Ethics Committee (Albury, NSW, Australia)                                                |
| 4004 | Frankston Hospital (Frankston, VIC, Australia)                                                                             | Peninsula Health Research and Ethics Committee, Frankston Hospital (Frankston, VIC, Australia)          |
| 4005 | Medical Oncologist Western Hospital (Footscray, VIC, Australia)                                                            | Melbourne Health Research Directorate Clinical Research Ethics Committee (Parkville, VIC, Australia)    |
| 4006 | Wesley Medical Centre (Auchenflower QLD, Australia)                                                                        | Wesley Hospital Multidisciplinary Ethics Committee, Wesley Medical Centre (Auchenflower QLD, Australia) |
| 4007 | Ashford Cancer Centre (Ashford, SA, Australia)                                                                             | Adelaide Community Health Care Alliance Inc., Research and Ethics Committee (Ashford, SA, Australia)    |
| 4008 | Clinical Trials Centre, Mount Hospital (West Perth, WA, Australia)                                                         | Mount Hospital Ethics Committee (West Perth, WA, Australia)                                             |
| 4010 | Medical and Health Sciences, University of Auckland (Auckland, New Zealand)                                                | Auckland Ethics Committee (Auckland, New Zealand)<br>Waikato Ethics Committee (Hamilton, New Zealand)   |
| 4011 | Oncology Department, Waikato Hospital (Hamilton, New Zealand)                                                              | Northern Y Regional Ethics Committee (Hamilton, New Zealand)                                            |
| 4012 | Cabrini Hospital, Medical Oncology (Malvern, VIC, Australia)                                                               | Cabrini Human Research Ethics Committee (Malvern, VIC, Australia)                                       |
| 5001 | 11, Côte du Palais (Québec, Canada)                                                                                        | Comité d'éthique de la recherche, Hôtel-Dieu de Québec (Québec, Canada)                                 |
| 5003 | Department of Medical Oncology, William Osler Health Centre, Brampton Memorial Hospital Campus (Brampton, Ontario, Canada) | William Osler Health Care Research Ethics Committee (Brampton, Ontario, Canada)                         |
| 5004 | 969 Queen Street East (Sault Ste. Marie, Ontario, Canada)                                                                  | Sault Area Hospital – Plummer Site East (Sault Ste. Marie, Ontario, Canada)                             |
| 5006 | Humber River Regional Hospital Church St. Site (Weston, Ontario, Canada)                                                   | Humber River Regional Hospital Church St. Site (Weston, Ontario, Canada)                                |
| 5007 | 596 Davis Drive (Newmarket, Ontario, Canada)                                                                               | Southlake Regional Health Centre (Newmarket, Ontario, Canada)                                           |
| 5008 | Trillium Health Centre, Oncology Clinic (Mississauga, Ontario, Canada)                                                     | Research Review Team, Trillium Health Centre (Mississauga, Ontario, Canada)                             |

N/A, not available.

<sup>a</sup>Clinical trials registered under ClinicalTrials.gov.
